# Supplementary material for: Disrupting the phase separation of KAT8–IRF1 diminishes PD-L1 expression and promotes antitumor immunity
Source: PubMed Central journal article supplement (PMC10042735; doi:10.1038/s43018-023-00522-1), 2023-03-09
Supplement: 43018_2023_522_MOESM1_ESM.pdf [file 43018_2023_522_MOESM1_ESM.pdf]

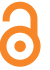

---

# **Disrupting the phase separation of KAT8–IRF1 diminishes PD-L1 expression and promotes antitumor immunity**

---

In the format provided by the authors and unedited

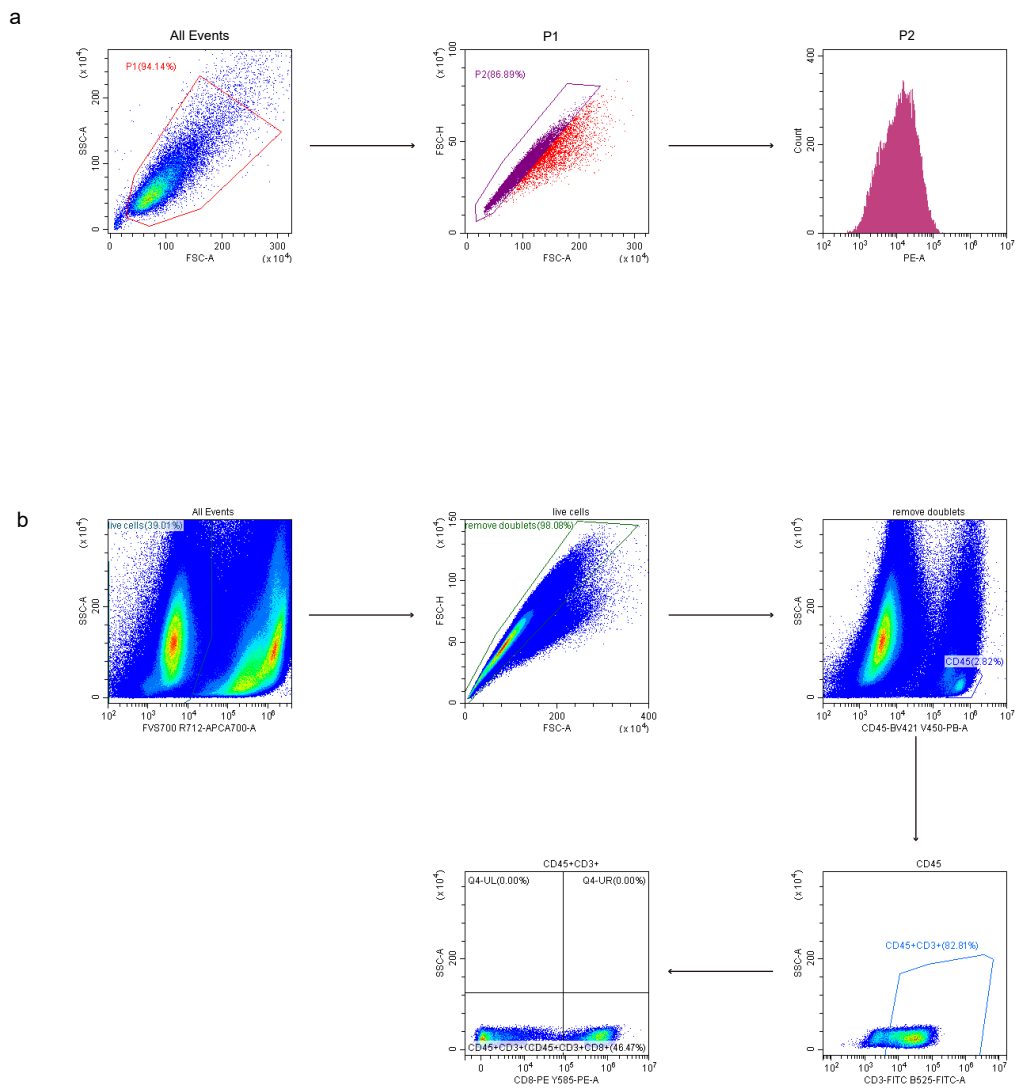

**Supplementary Fig. 1** Gating strategies for flow cytometry analysis.

**a.** Gating strategy for cell surface PD-L1 expression analysis of human cancer cell lines, related to **Extended Data Fig. 1**.

**b.** Gating strategy for analysis of CD3+CD8+ T cells in tumor-infiltrating lymphocytes, related to **Fig. 1, Fig. 8 and Extended Data Fig. 10**.

a

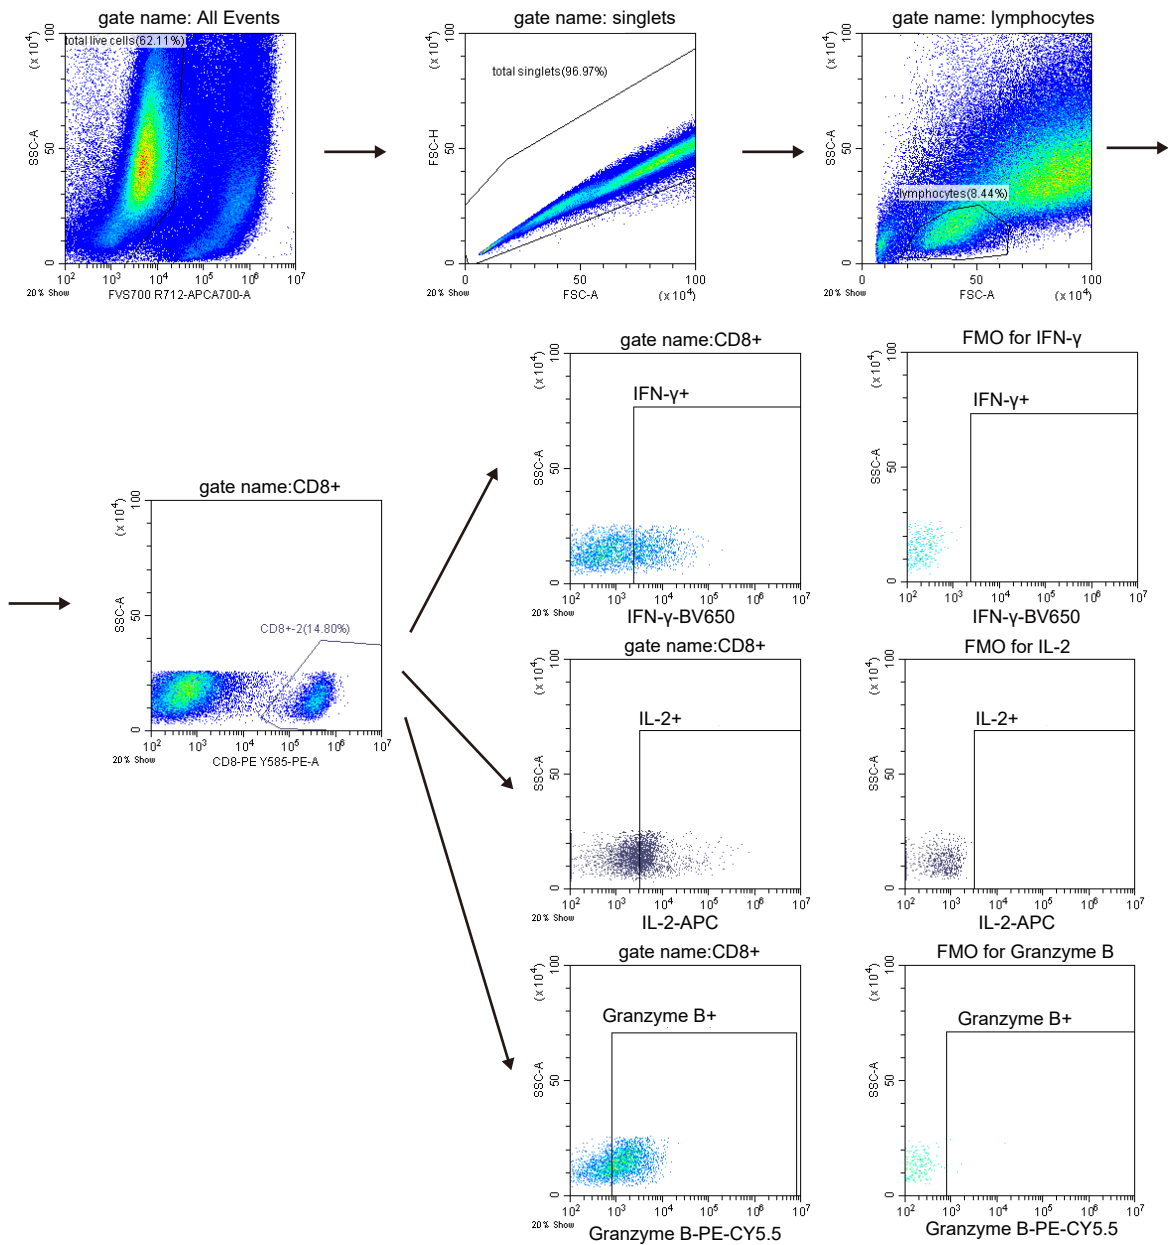

**Supplementary Fig. 2** Gating strategies for flow cytometry analysis.

**a.** Gating strategy for analysis of CD8+IFN- $\gamma$ +, CD8+IL2+, CD8+GranzymeB+T cells in tumor-infiltrating lymphocytes, related to **Fig. 8** and **Extended Data Fig. 10**
