# Supplementary material for: Disrupting the phase separation of KAT8–IRF1 diminishes PD-L1 expression and promotes antitumor immunity
Source: PubMed Central journal article supplement (PMC10042735; doi:10.1038/s43018-023-00522-1), 2023-03-09

Fig. 6a

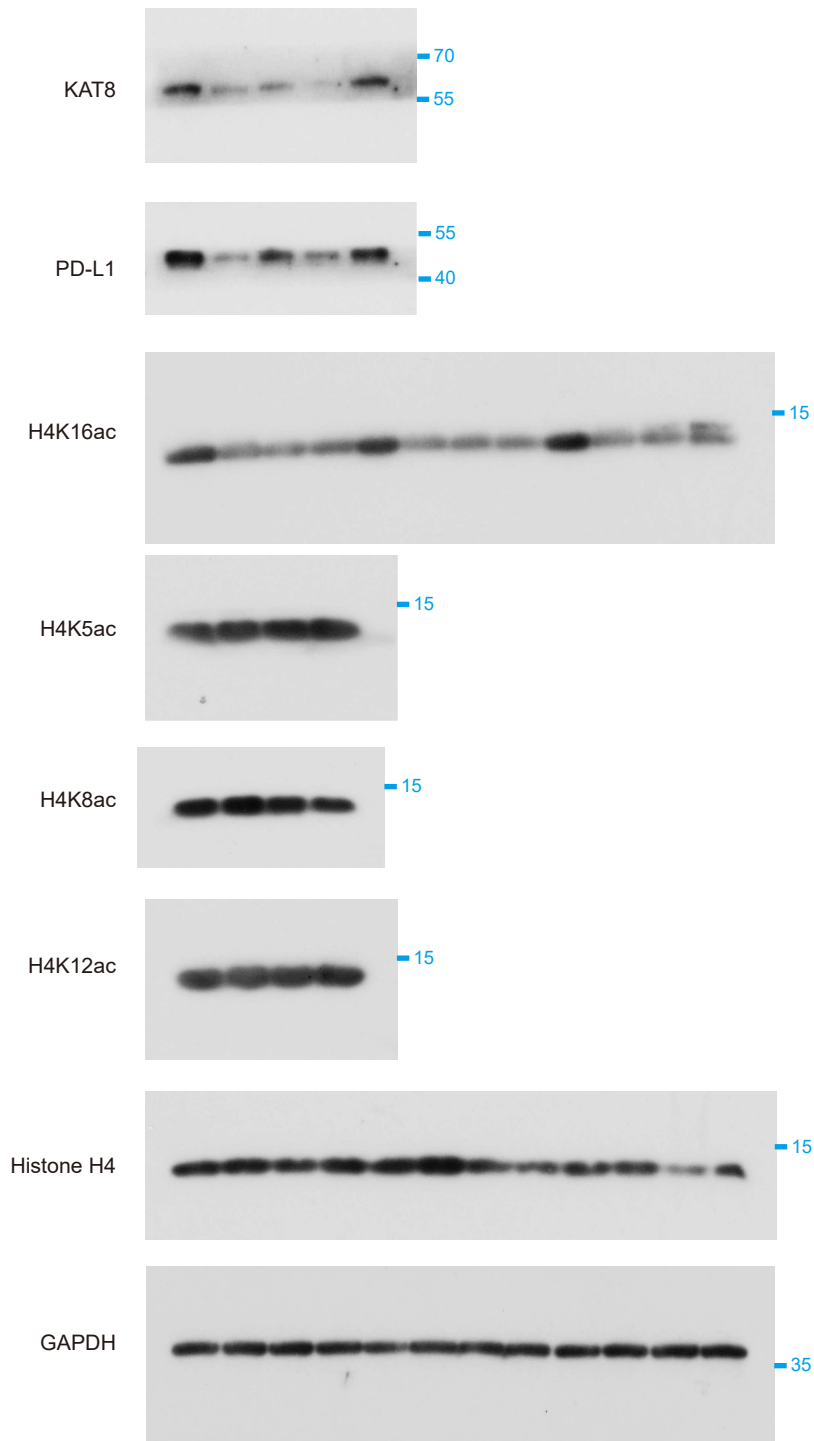

Supplement: 43018_2023_522_MOESM16_ESM.pdf [file 43018_2023_522_MOESM16_ESM.pdf]
